# Supplementary material for: Intelligent classification of platelet aggregates by agonist type
Source: eLife. 2020 May 12;9:e52938. doi: 10.7554/eLife.52938 (PMC7217700; doi:10.7554/eLife.52938)
Supplement: Figure 2—source data 1. — The population and ratio of dots in each area are shown in the source data table for all the four agonist types. The C1 areas indicate single platelets and platelet-platelet aggregates. The C2 areas indicate platelet-leucocyte aggregates. The C3 areas indicate blood cells other than platelets and leucocytes. The C4 areas indicate leucocytes. [file elife-52938-fig2-data1.xlsx]

## Sheet: Sheet1
Agonist	Area	Population	Ratio
ADP	C1	45260	0.9052
	C2	4708	0.0942
	C3	32	0.0006
	C4	0	0
Collagen	C1	46672	0.9334
	C2	3303	0.0661
	C3	25	0.0005
	C4	0	0
TRAP-6	C1	46297	0.9259
	C2	3689	0.0738
	C3	14	0.0003
	C4	0	0
U46619	C1	34030	0.6806
	C2	15924	0.3185
	C3	46	0.0009
	C4	0	0
