# Supplementary material for: Intelligent classification of platelet aggregates by agonist type
Source: eLife. 2020 May 12;9:e52938. doi: 10.7554/eLife.52938 (PMC7217700; doi:10.7554/eLife.52938)
Supplement: Figure 3—source data 1. — The coordinates of each point in the t-SNE plot are shown in the file. Label 0: ADP. Label 1: Collagen. Label 2: TRAP-6. Label 3 U46619. Label 4: Control. [file elife-52938-fig3-data1.xlsx]

## Sheet: Intensity
	label	x	y
0	0	19.97	50.65
1	3	-52.85	1.52
2	2	16.65	-25.36
3	2	-45.43	40.7
4	3	-33.76	64.35
5	0	19.79	32.7
6	2	18.6	-53.33
7	2	-44.75	-30.55
8	4	58.7	-6.67
9	3	-76.23	2.67
10	4	47.42	-1.36
11	3	-42.46	59.04
12	2	-27.98	37.28
13	4	41.96	-3.4
14	1	38.62	22.22
15	4	60.94	-9.33
16	4	41.98	-5.72
17	3	-87.2	-1.93
18	1	21.38	10.53
19	3	-53.18	5.06
20	2	5.62	-74.01
21	4	77.54	22.56
22	4	61.64	1.89
23	2	-49.63	-54.35
24	3	-30.71	62.1
25	0	18.17	-55.72
26	1	-21.58	25.3
27	0	10.46	48.59
28	0	13.12	-55.69
29	3	-55.5	-0.3
30	0	23.27	-6.01
31	0	21.3	10.32
32	2	-2.82	-67.52
33	2	-36.14	-38.48
34	1	14.91	13.41
35	3	-74.63	2.58
36	0	-7.44	-79.44
37	3	-67.91	16.08
38	1	5.17	26.08
39	1	-12.27	-5.38
40	0	24.7	68.86
41	2	-41.49	-11.86
42	4	45.83	-20.45
43	0	-20.52	17.92
44	2	-37.26	55.75
45	0	8.95	-15.61
46	1	24.87	-27.24
47	0	23.8	62.36
48	0	17.62	30.24
49	2	6.03	-54.54
50	4	83.97	4.95
51	4	66.13	-0.72
52	1	27.63	24.94
53	1	-21.88	25.77
54	4	55.03	-18.28
55	0	24.26	79.37
56	0	18.16	-53.27
57	1	22.65	17.67
58	4	46.84	-32.17
59	4	75.82	15.96
60	1	-12.02	-7.88
61	4	60.94	-19.4
62	3	-76.27	-36.99
63	4	48.34	-30.42
64	3	-42.94	52.49
65	1	-16.8	2.78
66	4	61.01	-4.53
67	4	96.86	-0.01
68	2	-55.64	25.82
69	2	-32.7	75.83
70	1	27.81	26.78
71	1	-55.12	43.27
72	4	55.82	-19.26
73	3	-71.72	-8.11
74	0	-10.75	57.11
75	4	90.03	-0.86
76	1	-0.03	4.99
77	2	-30.08	76.35
78	4	62.21	-12.45
79	2	-7.74	18.93
80	2	-44.09	-28.7
81	3	-52.34	34
82	2	-9.24	-64.71
83	2	-31.78	58.81
84	3	-69.08	-1.23
85	0	4.48	38.97
86	3	-43.34	8.9
87	0	-15.11	39.52
88	0	-20.46	5.85
89	1	29.04	20.44
90	3	-90.01	-5.81
91	0	27.52	71.24
92	1	6.34	-16.03
93	0	1.1	-25.78
94	0	-9.51	27.41
95	1	-6.66	5.1
96	0	27.39	72.59
97	1	28.76	19.92
98	0	5.47	43.87
99	4	34.31	-45.99
100	3	-27.34	70.68
101	4	81.25	-3.06
102	2	-39.3	-39.21
103	2	-48.6	-51.31
104	0	14.51	-53.13
105	3	-18.35	46.63
106	0	-12.87	35.08
107	0	32.57	-38.26
108	2	-6.9	56.34
109	4	62.25	-26.21
110	2	-11.51	-49.07
111	3	-37.43	68.76
112	0	-4.91	-59.14
113	4	70.78	-10.99
114	1	-11.43	-8.02
115	2	-35.27	-24.64
116	2	-44.66	-31.43
117	3	-53.24	-8.71
118	3	-37.67	44.65
119	1	8.96	-32.05
120	0	-2.21	-66.49
121	4	59.81	9.93
122	2	-42.53	-44.21
123	1	-9.26	6.55
124	2	-36.52	-18.35
125	1	-17.46	-10.26
126	4	78.19	-22.49
127	2	-41.76	-38.9
128	3	-72.13	-39.03
129	1	29.17	-6.29
130	3	-73.39	-37.43
131	3	-71.77	15.77
132	2	-9.55	-57.08
133	3	-64.85	-12.39
134	0	21.35	-34.28
135	1	-2.16	-35.39
136	4	52.96	-30.1
137	0	7.13	-65.31
138	3	-62.55	39.65
139	3	-64.88	4.96
140	0	-20.79	26.28
141	3	-24.19	50.73
142	3	-82.19	-26.45
143	2	-42.92	-13.48
144	2	-10.15	-78.14
145	1	3.48	0.71
146	3	-62.62	25.63
147	2	1.54	-38.5
148	2	-52.09	29.71
149	2	-11.93	-41.62
150	3	-64.27	3.88
151	1	-17.55	-20.48
152	1	-11.3	15.72
153	3	-78.77	-30.13
154	0	-13.31	37.63
155	4	78.02	-8.45
156	4	98.67	6.47
157	1	28.42	10.31
158	3	-88.46	-10.13
159	0	-43.14	52.53
160	2	-31.85	57.88
161	3	-52.05	34.95
162	4	68.81	-16.53
163	3	-74.15	12.06
164	0	25.46	-43.87
165	3	-81.08	-11
166	2	-26.97	79.1
167	1	-26.45	4.54
168	2	-2.86	-82.52
169	3	-81.51	-18.61
170	1	-29.97	45.78
171	2	-39.02	-44.44
172	1	-57.82	41.56
173	2	-22.23	71.99
174	1	10.07	31.06
175	4	40.82	-20.6
176	3	-72.22	-2
177	0	21.21	-33.85
178	2	-43.61	-42.44
179	4	102.15	8.88
180	0	21.8	-51.85
181	4	67.91	-0.3
182	4	73.92	8.77
183	0	8.5	-24.01
184	1	-8.26	13.92
185	3	-23.8	73.99
186	0	-4.78	55.82
187	1	29.16	-29.6
188	4	74.56	-11.39
189	4	62.1	-16.94
190	3	-81.68	-7.72
191	4	65.18	13.44
192	3	-29.71	13.07
193	3	-85.29	-29.17
194	0	6.16	-14.27
195	0	1.37	42.7
196	1	27.72	-6.79
197	0	-1.82	-31.32
198	2	27.4	-14.64
199	2	-2.87	-31.96
200	4	74.92	-8.16
201	3	-51.42	-8.61
202	3	-87.29	-13.27
203	3	-43.17	54
204	4	76.61	10.7
205	4	74.29	10.47
206	2	-40.31	-32.55
207	0	35.96	-41.85
208	2	7.57	-22.77
209	4	40.22	-12.45
210	0	24.71	75.05
211	1	-5.55	37.92
212	3	-76.5	-28.67
213	2	-38.91	68.6
214	2	-53.6	26.78
215	2	-30.18	59.25
216	4	69.41	-25.62
217	3	-73.08	-16.2
218	1	-4.13	33.51
219	3	-80.29	-20.02
220	1	-21.4	-21.13
221	4	60.35	-4.07
222	1	15.58	0.91
223	4	72.03	2.25
224	4	75.24	-18.35
225	0	5.15	48.49
226	0	12.33	-29.14
227	0	23.88	65.96
228	0	0.28	-75.86
229	2	-22.26	40.47
230	4	79.79	-18.23
231	3	-36.44	70.59
232	2	0.14	-33.73
233	0	24.65	80.39
234	1	-36.85	6.94
235	3	-59	-17.86
236	3	-62.83	21.51
237	2	24.08	-43.65
238	1	13.18	-30.72
239	2	-29.43	56.56
240	0	-30.18	36.05
241	1	-18.52	-21.94
242	4	90.28	23.08
243	4	45.19	-10.99
244	2	-48.07	58.7
245	1	11.51	12.53
246	3	-45.99	55.15
247	0	3.24	-20.09
248	2	-14.4	-82.52
249	0	28.25	66.68
250	1	9.73	-57.35
251	3	-65.65	-36.58
252	3	-82.11	-19.84
253	4	89.06	11.68
254	3	-52.24	36.07
255	2	-13.75	-88.1
256	0	17.61	42.59
257	4	76	-12.68
258	4	49.76	-20.03
259	4	68.33	5.63
260	0	25.56	-17.05
261	3	-78.44	7.73
262	4	73.22	-22.86
263	4	75.15	-18.89
264	2	-48.61	-10.43
265	2	-0.1	-76.44
266	1	-8.37	8.71
267	2	-5.51	-80.27
268	4	65.52	18.39
269	2	-9.95	-70.25
270	1	-16.83	12.8
271	1	8.03	3.3
272	2	-20.61	51.44
273	2	-31.88	51.23
274	3	-61.09	27.54
275	1	21.88	-5.16
276	3	-52.93	8.03
277	0	28.08	62.4
278	3	-85.96	-10.68
279	4	56.52	-26.4
280	1	28.36	9.77
281	3	-77.84	10.07
282	3	-54.95	2.58
283	1	8.62	55.99
284	1	-18.28	-8.81
285	2	-10.77	-72.65
286	0	-0.5	-75.51
287	2	-41.62	-33.92
288	2	-49.38	-54.2
289	0	-28.25	73.51
290	2	-12.17	-88.24
291	1	-7.21	11.12
292	4	65.5	-27.77
293	4	93.63	20.04
294	0	-46.72	55.08
295	2	-35.26	-25.5
296	3	-39.14	23.66
297	3	-44.48	-31.27
298	2	5.54	15.57
299	3	-59.09	-21.09
300	0	-20.16	57.88
301	3	-54.51	19
302	0	-10.84	1.21
303	3	-78.47	-14.68
304	2	33.94	-45.42
305	3	-58.12	-19.24
306	1	10.15	8.55
307	4	52.24	-0.69
308	4	43.55	-4.08
309	1	-13.69	27.94
310	1	7.55	56.82
311	1	40.47	16.27
312	4	94.88	9.58
313	4	93.49	-4.19
314	1	38.27	-43.37
315	0	-36.56	15.76
316	0	28.53	-41.23
317	4	61.44	-4.13
318	4	63.01	-4.71
319	3	-81.52	2.67
320	1	-27.95	39.72
321	0	-12.97	-88.76
322	0	-14.85	33.85
323	3	-75.5	-36.12
324	4	82.46	11.58
325	2	-18.85	21.11
326	3	-63.53	-16.67
327	2	-29.98	42.35
328	4	53.49	-18.48
329	2	-36.32	12.93
330	4	64.5	-31.09
331	4	59.46	4.11
332	2	-21.19	69.66
333	1	-1.38	-7
334	0	16.19	37.97
335	3	-78.95	1.97
336	1	-7.03	-51.62
337	3	-38.13	47.53
338	0	-14.18	-45.07
339	1	25.61	5.18
340	1	31.38	27.26
341	1	-11.46	20.05
342	0	-0.33	-34.86
343	0	24.85	77.78
344	4	70.62	-26.87
345	0	-5.02	20.34
346	0	1.77	-55.73
347	2	-8.33	-78.24
348	3	-62.66	3.43
349	0	1.88	-62.62
350	0	10.73	-34.59
351	0	5.09	-68.69
352	1	35.01	24
353	2	-67.82	34.91
354	0	-9.82	28.05
355	2	-46.55	-9.67
356	1	-8.26	19.02
357	2	-38.49	-42.75
358	1	-5.63	-9.63
359	1	-19.54	-1.38
360	2	-26.33	-42.3
361	1	-45.2	35.37
362	2	-45.55	-39.22
363	2	-41.14	-47.88
364	2	-20.08	70.38
365	4	54.35	0.14
366	4	46.24	-25.68
367	0	16.17	34.57
368	2	-22.37	65.79
369	2	-40.48	-32.21
370	2	-26.54	-41.79
371	4	61.11	-22.12
372	0	25.14	77.78
373	2	-25.94	35.25
374	0	21.23	62.66
375	3	-70.75	-22.33
376	4	92.43	6.47
377	1	14.34	13.32
378	3	-79.02	9.54
379	2	37.39	-21.05
380	4	61.67	-22.24
381	0	11.24	-54
382	1	-11.33	0.83
383	3	-74.59	-2.87
384	2	-10.26	-39.89
385	0	18.61	-18.67
386	2	-27.63	60.5
387	2	-8.54	-57.06
388	4	72.12	-27.59
389	1	-8.63	-20.47
390	2	-49.52	-52.88
391	3	-73.32	17.06
392	2	-32.84	73.17
393	1	4.22	45.83
394	4	81.3	-6.66
395	1	-35.38	0.95
396	3	-64.9	27.03
397	0	22.69	51.99
398	4	64.72	19.83
399	4	77.38	-10.13
400	2	-48	-46.2
401	4	71.39	-1.85
402	2	-48.91	-49.72
403	2	-22.88	61.59
404	1	-9.07	-57.47
405	1	-27.51	9.32
406	2	-32.65	-40.73
407	4	70.53	22.9
408	1	15.31	14.38
409	1	-0.67	-2.19
410	4	73.4	10.68
411	0	15.06	31.41
412	2	-0.94	-78.38
413	0	21.04	82.69
414	2	-30.17	60.12
415	1	-9.87	-6.8
416	2	-63.79	43.97
417	3	-44.21	9.14
418	4	86.06	1.44
419	2	-63.46	33.19
420	2	-25.67	62.4
421	1	-3.85	2.53
422	3	-42.71	62.77
423	3	-22.62	71.66
424	0	25.79	-32.86
425	0	-4.71	55.76
426	4	78.98	-19.08
427	1	39.95	26.16
428	4	96.23	-1.66
429	0	-37.11	24.68
430	0	6.73	-65.6
431	1	19.99	7.77
432	3	-86.18	-0.24
433	1	-19.98	6.21
434	4	92.26	4.27
435	3	-59.69	19.2
436	0	-9.73	56.06
437	0	22.97	-35.3
438	3	-70.95	-22.17
439	3	-30.81	51.54
440	1	-6.72	-6.33
441	4	78.26	-26.79
442	4	54.34	-12.22
443	1	2.3	2.37
444	1	33.95	17.1
445	4	50.68	-29.58
446	1	3.6	-20.71
447	1	-9.35	-14.25
448	4	38.78	-7.35
449	4	60.66	-24.58
450	1	-27.98	19.36
451	2	-66.94	42.21
452	1	33.26	25.46
453	4	67.49	13.82
454	0	27.86	-49.13
455	2	-35.81	57.04
456	3	-68.59	6.33
457	3	-77.91	-13.66
458	2	-43	-21.7
459	2	-64.45	24.3
460	1	-1.39	8.62
461	3	-54.24	6.78
462	0	23.12	79.48
463	2	-7.36	-83.73
464	2	17.96	-39.64
465	3	-67.11	-39.97
466	2	-6.4	-38.96
467	4	72.04	-13
468	3	-87.32	-2
469	3	-74.06	-25.02
470	0	10.46	40.14
471	0	-9.05	-60.86
472	4	69.27	-1.43
473	3	-73.57	-25.01
474	2	-12.39	-75.78
475	4	102.05	2.67
476	2	24.92	-18.96
477	4	49.3	-11.16
478	4	92.34	23.76
479	3	-74.13	-26.96
480	2	-63.39	17.31
481	1	1.27	30.86
482	2	-27.41	55.63
483	4	65.04	-24.45
484	4	53.37	-10.22
485	4	72.32	2.97
486	4	84.78	10.33
487	0	-6.61	56.42
488	1	-16.61	-21.1
489	4	78.13	9.61
490	2	27.76	-28.24
491	1	-15.65	12.35
492	1	22.04	-1.72
493	4	90.25	-1.35
494	0	28.92	-29.9
495	0	16.29	48.65
496	2	-12.95	39.47
497	3	-88.71	-10.05
498	4	45.82	-25.51
499	1	30.63	26.43
500	3	-64.94	-12.46
501	1	-3.12	-8.11
502	2	26.57	-42.21
503	2	-40.53	57.27
504	4	94.27	-4.69
505	0	21.03	82.76
506	3	-85.61	-29.03
507	1	28.13	25.85
508	3	-37.77	11.65
509	0	23.98	-13.29
510	1	-18.41	-7.88
511	0	18.35	-12.48
512	0	25.18	-31.03
513	3	-80.58	0.57
514	4	76.26	25.19
515	0	27.91	61.97
516	1	17.47	-0.11
517	2	16.4	-26.58
518	2	-40.61	-31.18
519	0	6.92	48.11
520	1	31.88	19.19
521	3	-86.66	-10.42
522	3	-70.63	-39.94
523	1	-10.54	-19.03
524	1	18.88	48.38
525	1	23.78	-4.52
526	4	58.82	-10.12
527	1	32.54	15.83
528	4	62	-4.54
529	1	-8.85	-6.59
530	1	21.73	-5.41
531	1	42.16	29.44
532	4	81.01	9.43
533	0	-14.31	-47.43
534	1	16.04	40.63
535	1	41.18	10.11
536	3	-73.06	-38.38
537	1	-1.14	38.48
538	1	19.34	11.97
539	0	-5.94	-74.17
540	1	-33.69	5.02
541	2	7.78	-74.17
542	2	-25.32	49.3
543	1	16.82	-4.12
544	1	-12.86	3
545	3	-73.9	-28.03
546	3	-74.11	13.93
547	2	-59.05	40.27
548	3	-26.78	51.73
549	4	80.09	1.82
550	2	-17.9	8.92
551	2	-36.15	19.51
552	2	-33.48	-35.86
553	2	-44.44	-40.3
554	2	-14.62	-40.92
555	3	-65.23	22.46
556	4	87.52	-7.74
557	1	-8.74	9.95
558	4	79.6	15.66
559	3	-61.05	-13.88
560	1	-11.9	-17.31
561	4	56.37	2.04
562	3	-27.88	22.02
563	0	-48.6	36.28
564	1	-7.08	4.76
565	0	11.61	29.16
566	2	-43.31	37.67
567	3	-67.2	42.15
568	2	-50.66	37.45
569	4	73.04	-14.43
570	1	-22.71	-23.05
571	4	93.03	-3.78
572	1	-4.03	-3.67
573	0	-14.66	-51.22
574	3	-71.81	-7.93
575	3	-27.52	51.89
576	3	-63.88	-25.35
577	1	38.35	22.48
578	3	-70.3	16.37
579	1	13.97	-22.75
580	2	7.66	-74.09
581	0	-20.9	25.11
582	2	-69.29	41.44
583	4	94.98	3.53
584	3	-60.1	-21.83
585	3	-23.06	80.64
586	0	-3.59	17.45
587	4	68.4	-14.88
588	0	23.69	-37.98
589	4	102.77	9.05
590	1	30.59	11.02
591	4	67.25	0.13
592	3	-77.98	-11.42
593	4	65.64	-31.78
594	1	-1.54	0.79
595	4	92.71	5.3
596	3	-51.1	7.2
597	4	67.69	2.52
598	4	55.96	-15.17
599	1	-16.32	13.94
600	3	-77.8	9
601	4	78.45	20.54
602	2	-0.9	-76
603	0	19.29	37.49
604	2	-13.35	-69.7
605	4	75.92	-10.96
606	0	-14.07	53.64
607	4	44.05	-27.35
608	2	26.59	-17.53
609	1	20.85	13.27
610	1	12.46	0.1
611	4	83.88	23.56
612	2	-34.42	-32.47
613	4	93.38	6.6
614	0	19.31	55.16
615	4	72.91	20.7
616	1	22.25	51.91
617	2	34.34	28.44
618	3	-72.25	5.29
619	4	56.56	-6.62
620	4	78.69	-19.22
621	1	-0.43	4.35
622	1	20.25	16.29
623	4	74.11	6.92
624	2	17.62	-55.36
625	1	-5.38	-10.07
626	1	11.5	2.16
627	3	-61.9	5.87
628	3	-65.24	-15.68
629	2	-23.1	-42.55
630	0	-12.61	46.66
631	1	18.94	0.17
632	1	-19.63	23.68
633	3	-36.56	47.2
634	3	-40.66	48.44
635	0	-31.54	23.65
636	4	73.02	22.11
637	0	-29.67	33.42
638	2	-7.16	-37.05
639	3	-34.24	69.18
640	1	-22.07	4.35
641	4	50.94	-25.94
642	1	14.99	-28.38
643	1	-17.87	-19.36
644	4	73.45	-17.29
645	2	-14.92	-56.04
646	2	-41.23	-47.59
647	0	-27.48	4.55
648	4	96.78	-1.02
649	0	-0.94	34.78
650	2	36.13	-5.51
651	3	-70.42	-40.09
652	4	62.37	-26.51
653	3	-76.18	2.66
654	0	-80.39	46.56
655	4	43.94	-4.07
656	1	-4.27	31.22
657	3	-64.59	27.34
658	0	15.88	36.73
659	0	-8.38	45.13
660	4	80.52	9.77
661	1	-5.97	-11.12
662	0	-6.59	-39.21
663	2	20.45	-45.39
664	2	-36.36	69.04
665	3	-46.82	53.34
666	3	-24.32	80.03
667	1	-27.31	30.02
668	1	34.57	-3.84
669	2	-45.97	-21.95
670	3	-54.69	38.45
671	1	10.32	-24.02
672	4	78.58	-10.53
673	0	23.27	79.78
674	4	99.05	8.05
675	0	19.6	39.3
676	4	70.13	-30.4
677	2	-41.97	-47.75
678	3	-48.24	9.74
679	4	96.96	2.8
680	2	-19.38	62.73
681	3	-25.96	75.01
682	1	-30.22	2.77
683	4	48.8	-2.91
684	1	11.95	11.73
685	0	5.09	49.19
686	2	-0.66	23.6
687	0	6.31	-64.67
688	0	17.17	39.71
689	3	-80.99	-7.22
690	3	-82.54	-0.57
691	0	1.72	-23.19
692	0	2.78	-54.46
693	2	34.31	-46.5
694	3	-41.31	-14.64
695	1	43.26	28.93
696	3	-61.6	2.51
697	1	33.47	-19.37
698	4	61.39	-1.06
699	1	28.63	-17.26
700	0	18.82	49.6
701	1	-9.73	-7.51
702	1	-30.3	21.76
703	1	13.46	-5.23
704	0	21.95	-24.46
705	2	-59.76	29.22
706	0	0.21	-35.73
707	4	67.4	-5.85
708	0	-5.95	-39.27
709	3	-81.52	-10.49
710	3	-68.77	34.91
711	0	22.36	48.65
712	1	25.28	-18.84
713	4	62.07	-31.82
714	1	-22.2	14.2
715	4	86.92	0.74
716	2	-68.77	39.54
717	0	4.89	-35.08
718	1	13.41	-14.94
719	2	16.03	-53.3
720	1	-17.48	-3.73
721	4	82.15	-9.24
722	2	18.96	-52.99
723	3	-72.87	7.58
724	0	-23.78	60.1
725	2	-58.46	41.27
726	0	14.38	-6.82
727	1	-9.6	-3.51
728	0	-13.59	-10.96
729	4	77.9	15.57
730	3	-70.86	-22.92
731	2	-31.81	69.83
732	2	-14.59	-57.77
733	0	-1.73	-68.45
734	1	-1.11	7.01
735	1	29.45	-16.81
736	0	19.88	56.39
737	1	27.98	-14.07
738	2	-44.92	-25.69
739	0	19.92	60.72
740	2	-34.52	-43.95
741	0	12.67	53.36
742	1	14.72	26.54
743	0	-1.36	-38.31
744	0	25.06	65.61
745	3	-24.86	71.68
746	0	-20.97	25.37
747	1	-8	-7.82
748	1	32.81	19.79
749	3	-69.93	-41.02
750	1	7.27	31.59
751	2	-44.97	-38.89
752	2	-59.03	40.62
753	0	26.27	-36.82
754	0	24.4	61.98
755	0	2.29	20.44
756	4	86.18	-5.7
757	1	-27.98	8.14
758	0	14.13	-28.82
759	1	32.95	-38.1
760	2	-47.82	-5.13
761	2	-20.46	37.92
762	0	-3.46	15.75
763	2	-14.08	-73.1
764	0	20.63	83.18
765	3	-82.12	-6.98
766	0	-24.64	71.93
767	2	6.61	-71.79
768	1	-17.44	-3.46
769	2	-26.06	-44.81
770	2	-55.52	25.37
771	3	-39.45	-12.26
772	2	-46.86	-44.22
773	4	54.96	-12.25
774	0	18.62	-32.14
775	0	27.82	-47.12
776	4	68.84	5.48
777	4	63.87	8.22
778	3	-75.76	11.89
779	1	-2.15	-7.8
780	1	20.8	54.73
781	3	-27.99	66.24
782	1	20.07	-24.13
783	1	19	4.78
784	0	7.1	-64.91
785	4	93.55	14.73
786	2	15.36	-59.58
787	2	5.44	-57.19
788	1	2.06	2.19
789	3	-64.86	-38.08
790	3	-80.68	-16.49
791	4	40.39	-21.48
792	1	-11.01	-50.43
793	1	16.6	-8.56
794	0	-25.05	62.8
795	1	-10.3	-20.89
796	3	-77.71	-14.73
797	0	25.3	9.08
798	1	-2.26	15.33
799	3	-74.54	-26.8
800	3	-66.31	-12.12
801	3	-46.1	7.21
802	1	22.01	17.34
803	2	-46.13	-24.19
804	4	79.61	18.18
805	3	-72.98	-23.22
806	1	-12.24	3.21
807	1	-10.46	0.11
808	2	-31.24	17.05
809	2	-25.2	-41.18
810	1	-30.6	41.26
811	2	-40.47	-14.29
812	3	-63.88	-30.9
813	3	-10.31	49.73
814	2	-20.47	73
815	3	-66.58	-33.76
816	2	-2.34	-60.47
817	0	18.03	25.98
818	1	-19.61	-21.05
819	0	-24.47	44.59
820	1	43.82	27.97
821	2	-45.22	-46.56
822	0	4.58	33.83
823	0	26.58	62.16
824	4	88.53	-0.79
825	0	20.45	83.39
826	3	-52.05	33.41
827	1	-14.21	-17.13
828	1	35.15	12.36
829	3	-71.22	-29.64
830	4	74.26	-10.43
831	4	49.42	-31.94
832	1	-9.98	-14.45
833	4	70.76	18.87
834	4	48.21	-0.9
835	4	73.33	20.18
836	4	78.61	17.1
837	2	-39.33	-36.43
838	3	-24.65	45.23
839	3	-18.86	64.14
840	1	24.92	-27.41
841	3	-49.66	36.59
842	4	76.31	4.88
843	0	-11.62	-0.26
844	4	62.09	8.8
845	0	-8.14	-80.53
846	1	-18.81	21.6
847	1	-1.23	-0.33
848	2	3.87	-67.83
849	3	-44.13	-14.1
850	4	87.86	12.65
851	4	81.72	22.91
852	1	28.52	24
853	0	35.05	-42.75
854	4	78.15	10.56
855	3	-27.67	46.44
856	3	-73.03	-38.96
857	0	-10.97	54.16
858	3	-85.32	-0.66
859	4	69.17	-24.8
860	0	22.44	50.66
861	2	-33.27	-39.4
862	2	32.15	-19.63
863	3	-2.12	-30.52
864	3	-59.5	-20.48
865	4	56.61	-4.93
866	3	-34.47	63.16
867	4	70.78	-23.51
868	3	-31.47	19.01
869	0	-30.97	-34.18
870	1	5.45	29.37
871	3	-33.64	34.49
872	4	39.59	-4.59
873	1	10.91	-14.9
874	4	90.39	18.09
875	2	-44.4	56.61
876	1	-11.05	-18.22
877	2	15.68	-57
878	1	16.34	3.21
879	3	-69.56	-35.88
880	2	0.25	-51.19
881	1	-14.17	-18.6
882	0	-28.29	66.82
883	1	12.36	33.8
884	1	25.7	-28
885	2	27.32	-45.48
886	4	71.13	17.33
887	2	-13.21	59.82
888	4	75.67	-18.02
889	2	-35.99	-26.69
890	3	-79.45	11.06
891	4	41.54	-21.46
892	1	-10.81	-0.76
893	4	73.57	10.43
894	1	18.09	-38.69
895	3	-71.85	-39.61
896	0	-10.39	55.99
897	3	-54.29	6.47
898	0	3.89	31.69
899	2	-2.91	-70.86
900	0	-19.05	24.08
901	0	8.21	-70.64
902	3	-39.32	-39.31
903	4	51.31	-3.98
904	4	74.06	9.89
905	4	70.26	-23.47
906	4	93.28	1.17
907	4	70.27	-21.79
908	4	41.28	-27.92
909	1	-20.08	-20.31
910	3	-74.6	9.68
911	4	53.5	-11.79
912	0	-6.36	-12.08
913	0	11.89	34.32
914	3	-64.94	23.04
915	0	-6.24	-75.86
916	2	-18.88	51.3
917	4	50.92	-4.06
918	3	-30.2	48.21
919	1	7.62	2.61
920	0	12.07	48.32
921	1	-3.66	-3.68
922	4	53.97	-31.06
923	4	68.18	17.09
924	1	33.93	13.74
925	1	-18	-22.5
926	4	71.49	0.57
927	2	-4.36	-44.57
928	4	89.63	11.45
929	1	7.23	31.58
930	4	86.18	15.66
931	4	74.9	-17.18
932	3	-0.18	-35.79
933	4	69.43	-29.41
934	2	-14.06	-85.63
935	4	83.77	19.77
936	1	-10.63	11.77
937	4	75.52	-2.35
938	2	-68.23	45.07
939	0	-26.89	63.23
940	3	-72.03	15.44
941	2	-3.61	-45.56
942	2	-12.26	55.54
943	4	75.31	21.28
944	3	-66.84	9.67
945	3	-13.19	56.98
946	4	60.91	-16.78
947	0	3.5	18.18
948	0	35.38	-46.14
949	4	47.16	-24.19
950	1	-12.41	-16.62
951	2	-23.28	-34.68
952	2	-26.91	35.37
953	4	69.9	-30.5
954	3	-43.03	59.95
955	2	4.3	-49.77
956	2	-12.66	-47.88
957	2	-10.42	-69.65
958	0	-1.76	-48.39
959	0	7.29	55.04
960	3	-41.5	-22.99
961	2	-32.32	-40.69
962	4	59.53	-15.24
963	2	-35.07	-40.38
964	0	32.74	-39.15
965	3	-76.24	45.22
966	0	15.6	32.08
967	2	-22.2	83.08
968	1	-1.57	-42.15
969	3	-70.13	-24.07
970	1	-0.49	5.88
971	2	-37.46	61.15
972	0	12.77	-31.17
973	2	-44.76	-37.96
974	3	-70.02	-31.51
975	2	-76.2	45.02
976	2	-25.46	82.52
977	3	-67.58	42.9
978	4	95.96	-1.76
979	0	22.07	54.12
980	3	-60.68	27.01
981	1	-30.01	11.24
982	4	78.14	26.97
983	2	-38.23	-34.71
984	4	73.12	23.7
985	1	18.93	6.95
986	3	-83.99	-25.69
987	4	65.17	-20.31
988	1	41.38	15.16
989	4	42.43	-4.71
990	4	66.68	12.91
991	4	45.07	-13.39
992	0	20.38	56.54
993	3	-69.69	-28.37
994	3	-33.02	74.48
995	3	-71.11	43.48
996	1	27.87	26.54
997	4	102.19	4.76
998	2	-14.04	-72.47
999	1	-17.05	16.02
1000	3	-39.22	67.58
1001	1	-28.25	3.83
1002	4	85.35	-2.88
1003	2	-43.81	-48.39
1004	0	13.67	26.63
1005	2	2.57	-49.87
1006	2	-49.7	-54.39
1007	1	-1.29	-60.44
1008	2	-80.64	46.59
1009	1	39.64	25.18
1010	3	-47.72	7.68
1011	4	70.79	22.91
1012	3	-25.58	27.05
1013	4	78.56	20.86
1014	1	-32.56	2.49
1015	2	-40.01	-25.66
1016	1	18.12	27.27
1017	0	27.25	72.92
1018	3	-51.06	37.91
1019	4	66.01	-27.17
1020	0	-0.51	-60.41
1021	1	-12.18	0.68
1022	3	-80.44	2.48
1023	3	-79.49	-26.29
1024	4	69.76	2.1
1025	0	5.75	30.11
1026	1	37.87	14.7
1027	1	-21.13	4.18
1028	0	2.04	37.41
1029	3	-60.35	-13.11
1030	0	18.9	28.33
1031	2	1.76	-26.97
1032	1	3.06	29.66
1033	1	-26.56	8.43
1034	2	-10.85	-72.46
1035	3	-79.39	2.19
1036	0	-9.87	-86.46
1037	2	-48.17	-50.27
1038	0	-13.74	-82.19
1039	4	65.73	-30.28
1040	2	1.05	-69.07
1041	3	-23.7	60.41
1042	0	-22.36	44.55
1043	1	34.39	-1.67
1044	3	-54.06	27.78
1045	4	82.4	22.24
1046	3	-72.18	-3.19
1047	2	-14.93	-55.7
1048	2	-7.24	-83.3
1049	3	-82.84	-20.97
1050	2	-31.99	-42.49
1051	1	28.26	26.12
1052	0	-23.9	44.31
1053	3	-73.94	45.44
1054	0	-2.49	-80.52
1055	0	-11.24	36.15
1056	1	5.95	-17.59
1057	3	-68.13	-15.67
1058	0	0.22	-70.72
1059	3	22.29	-17.22
1060	4	74.19	14.21
1061	0	2.22	45.22
1062	0	24.87	58.69
1063	3	-74.96	-36.83
1064	4	79.23	-10.3
1065	1	32.9	17
1066	1	5.01	34.46
1067	0	-11.6	59.05
1068	4	99.62	4.06
1069	0	26.45	-32.52
1070	3	-61.83	-18.56
1071	3	-71.1	-22.04
1072	3	-53.33	36.35
1073	1	5.62	45.13
1074	4	68.5	-19.27
1075	2	-44.26	40.64
1076	4	65.48	19.71
1077	2	-63.28	17.75
1078	2	-33.26	74
1079	0	21.49	82.23
1080	1	-34.41	5.67
1081	4	70.52	13.64
1082	1	-3.79	3.52
1083	1	-28.64	17.93
1084	0	23.03	-44.83
1085	0	9.38	-49.92
1086	2	-47.82	31.53
1087	4	75.79	0.84
1088	1	-6.73	27.01
1089	0	-14.61	-56.05
1090	4	83.69	23.55
1091	0	24.21	-3.12
1092	2	-10.18	-69.69
1093	1	6.6	9.06
1094	4	94.19	3.63
1095	4	69.67	13.39
1096	3	-57.23	20.06
1097	2	-47.21	-44.44
1098	4	67.49	13.49
1099	3	-62.94	-32.76
1100	3	-77.1	-29.19
1101	1	5.17	-51.76
1102	1	26.03	21.91
1103	1	-57.31	44.25
1104	0	12.27	-45.63
1105	2	-7.95	19.19
1106	3	-81.7	4.72
1107	0	13.75	-4.68
1108	4	48.5	-8.95
1109	2	-7.45	-83.95
1110	3	-64.62	-18.75
1111	4	89.47	21.35
1112	2	-9.94	-43.04
1113	1	18.86	-15.23
1114	4	58.9	-8.74
1115	4	49.26	-20.6
1116	1	-25.57	10.63
1117	0	-1.79	34.2
1118	4	68.79	-23.82
1119	3	-26.99	53.31
1120	2	-49.44	-53.03
1121	4	45.28	-31.18
1122	1	9.3	57.77
1123	4	85.52	13.27
1124	0	5.97	38.38
1125	1	-5.63	-9.23
1126	0	9.97	-44.23
1127	4	34.64	-5.54
1128	4	67.24	-26.32
1129	1	36.63	26.68
1130	3	-73.95	-23.65
1131	4	71.2	-12.18
1132	1	-20.39	18.14
1133	2	-70.82	11.78
1134	1	-4.76	4.08
1135	2	6.51	-68.53
1136	4	50.49	-29.55
1137	4	71.41	9.83
1138	4	67.68	20.27
1139	3	-42.73	26.44
1140	1	29.41	23.17
1141	0	28.91	-17.22
1142	4	46.97	-5.87
1143	2	-41.55	-14.42
1144	2	15.16	-60.9
1145	3	-33.96	10.31
1146	1	27.82	26.67
1147	2	-22.94	19.52
1148	3	-68.58	-42.72
1149	0	-11.7	1.11
1150	1	30.8	10.02
1151	1	42.95	29.12
1152	3	-80.87	-19.22
1153	3	-25.44	77.84
1154	3	-73.98	-18.45
1155	3	-72.31	41.97
1156	3	-62.74	16.88
1157	3	-56.2	25.53
1158	4	77.91	-20.7
1159	3	-79.89	-21.85
1160	3	-67.8	-11.26
1161	3	-63.57	3.59
1162	0	3.37	-22.79
1163	3	-77.09	-28.13
1164	4	75.51	6.11
1165	2	20	-11.75
1166	1	17.86	-10.61
1167	4	101.94	2.87
1168	3	-31.34	46.13
1169	4	69.28	14.12
1170	1	-2.12	22.92
1171	0	21.91	61.8
1172	3	-87.23	-2.16
1173	3	-33.23	63.3
1174	4	39.84	-2.62
1175	4	54.3	-8.96
1176	3	-66.23	-6.12
1177	0	-3.05	36.38
1178	1	32.28	-33.77
1179	0	20.57	-32.92
1180	4	49.1	-11.95
1181	2	-39.48	57.86
1182	2	-12.57	56.65
1183	3	-82.67	-31.19
1184	1	-17.56	-10.95
1185	0	19.74	-29.89
1186	3	-42.18	62.45
1187	4	68.61	-4.4
1188	4	47.11	-11.85
1189	1	-12.09	-17.86
1190	2	-11.92	53.92
1191	3	-26.34	61.43
1192	2	-14.08	-74.59
1193	0	-9.69	-56.9
1194	1	20.43	1.14
1195	3	-73.66	9.11
1196	3	-60.52	23.27
1197	0	17.22	-48.09
1198	1	12.71	50.65
1199	2	-25.52	65.19
1200	3	-82.21	-19.92
1201	0	35.06	-4.35
1202	0	-6.46	55.97
1203	4	53.3	-1.63
1204	0	5.44	-58.26
1205	2	-23.96	76.16
1206	0	25.18	-32.28
1207	0	24.57	76.37
1208	4	66.74	-2.14
1209	1	43	28.42
1210	2	-39.8	-43.48
1211	3	-62.12	31.98
1212	3	-71.99	-30.3
1213	1	-29.4	20.94
1214	0	12.65	40.64
1215	1	21.61	-13.83
1216	4	70.29	15.56
1217	2	19.4	-16.76
1218	3	-73.77	-23.9
1219	1	-5.28	7.12
1220	0	-13.15	-86.68
1221	3	-77.48	-31.08
1222	3	-71.5	45.83
1223	4	69.46	-21.94
1224	0	32.98	4.79
1225	0	16.59	-53.56
1226	3	-30.73	49.46
1227	3	-62.96	3.87
1228	2	-49.51	-52.46
1229	3	-38.39	62.14
1230	0	18.02	1.67
1231	3	-24.41	83.88
1232	1	-22.02	59.41
1233	0	26.85	-5.43
1234	0	-5.21	-49.54
1235	4	52.73	-24.14
1236	0	21.81	57.8
1237	2	13.15	-4.57
1238	2	-33.26	76.51
1239	4	85.8	-5.56
1240	1	-9.62	9.6
1241	4	63.94	-24.47
1242	3	-80.58	-17.15
1243	4	64.84	-20.21
1244	2	-35.03	-32.27
1245	4	66.84	1.35
1246	0	-12.32	34.19
1247	3	-86.56	-1
1248	2	-19.19	59.8
1249	4	56.3	-4.22
1250	0	14.1	-42.57
1251	2	-6.28	-45.46
1252	4	49.43	-3.77
1253	4	58.99	-26.65
1254	4	61.11	-18
1255	0	10.87	47.36
1256	1	21.78	17.26
1257	0	-19.39	72.62
1258	0	1.85	29.42
1259	1	14.22	2.36
1260	3	-50.69	35.52
1261	3	-74.95	-37.39
1262	1	8.19	56.3
1263	4	68.11	13.67
1264	4	63.81	-1.26
1265	3	-49.83	36.12
1266	2	28.46	-37.97
1267	0	28.33	63.13
1268	3	-64.83	35.11
1269	2	-1.95	-68.43
1270	1	28.83	4.87
1271	0	25.11	-33.02
1272	3	-62.31	34.56
1273	1	17.01	-37.51
1274	0	23.93	-48.35
1275	0	7.17	48.4
1276	2	-57.5	43.81
1277	0	3.1	-53.62
1278	4	71.62	-23.08
1279	3	-33.05	43.9
1280	3	-35.88	67.25
1281	3	-62.13	18.57
1282	4	97.71	4.23
1283	3	-54.25	7.11
1284	2	-45.58	-39.36
1285	0	29.48	-41.14
1286	3	-84.36	1.34
1287	4	45.5	-3.55
1288	3	-71.73	-2.37
1289	2	6.6	-65.22
1290	3	-64.59	-18.63
1291	3	-83.28	2.43
1292	2	1.35	-54.64
1293	4	84.77	22.14
1294	0	28.5	-48.7
1295	3	-43.9	-24.45
1296	0	6.73	-64.18
1297	0	-5.41	-81.23
1298	1	13.48	3.97
1299	4	60.74	-11.37
1300	4	84.11	1.01
1301	3	-70.56	-38.65
1302	4	80.03	-4.23
1303	4	49.33	-31.95
1304	1	-9.8	4.6
1305	4	87.29	1.2
1306	3	-43.4	6.25
1307	0	-4.09	39.73
1308	0	-8.79	38.99
1309	0	-31.34	50.34
1310	1	-4.21	24.61
1311	2	-25.08	80.61
1312	3	-21.08	80.66
1313	3	-41.01	65.53
1314	3	-77.88	13.18
1315	4	85.92	1.24
1316	1	-2.78	-7.97
1317	0	2.23	34.63
1318	4	79.24	9.76
1319	3	-30.61	71.79
1320	3	-75.43	-32.94
1321	3	-36.68	11.11
1322	3	-75.24	2.49
1323	0	0.36	-37.07
1324	0	-2.59	-63.12
1325	3	-23.22	41.38
1326	4	52.02	-4.34
1327	3	-35.83	8.05
1328	2	-61.75	49.96
1329	2	-13.48	-85.9
1330	4	79.79	-8.22
1331	0	5.2	-70.82
1332	1	-18	-22.8
1333	0	4.09	-58.91
1334	4	49.92	-4.36
1335	4	91.34	-0.15
1336	2	25.07	-49.35
1337	1	9.64	-58.54
1338	0	31.66	-36.93
1339	3	-31.85	59.81
1340	0	4.06	7.38
1341	2	-40.26	-16.9
1342	3	-72.34	0.97
1343	2	-45.89	36.46
1344	3	-60.61	31.92
1345	3	-42.79	52.27
1346	3	-65.87	4.55
1347	4	69.12	-28.34
1348	4	69.82	-19.46
1349	1	-12.11	-16.17
1350	4	61.67	-27.48
1351	2	-44.58	-26.1
1352	0	8.52	-69.89
1353	1	-12.39	37.88
1354	1	-22.88	16.39
1355	0	-10.95	-10.73
1356	4	103.16	8.14
1357	1	-14.53	-23.27
1358	1	0.77	9.62
1359	0	17.71	40.02
1360	3	-62.84	-20.28
1361	2	5.92	-39
1362	3	-71.24	-38.27
1363	4	46.74	-11.91
1364	2	-12.05	59.2
1365	4	87.96	15.62
1366	0	-9.18	38.27
1367	2	-30.83	-43.75
1368	3	-83.61	-25.7
1369	1	-39.87	25.35
1370	0	26.68	73.2
1371	3	-88.52	-9.41
1372	3	-40.17	54.32
1373	3	-65.49	-11.98
1374	3	-73.41	-38.04
1375	2	0.67	-71.92
1376	3	-65.9	-37.09
1377	2	-53.68	33.06
1378	1	-7.47	12.96
1379	4	82.3	-0.02
1380	1	-35.95	1.87
1381	4	61.38	-8.18
1382	3	-77.91	3.2
1383	3	-84.32	-28.37
1384	1	24.6	-17.29
1385	3	-39.75	-17
1386	3	-21.57	67.64
1387	3	-21.82	45.05
1388	4	60.38	-18.25
1389	0	11.84	-21.74
1390	4	90.24	23.08
1391	4	40.31	-12.76
1392	0	-21.87	26.21
1393	4	60.34	4.24
1394	1	-19.98	2.94
1395	3	-83.66	-25.23
1396	0	-13.98	44.66
1397	1	19.6	55.99
1398	2	-9.11	-69.54
1399	0	-9.7	38.79
1400	3	-55.28	6.67
1401	3	-73.1	43.58
1402	1	0.55	-1.19
1403	0	1.17	-71.68
1404	1	11.99	3.38
1405	3	-56.62	41.61
1406	0	7.76	-65.71
1407	3	-62.82	15.45
1408	3	-59.38	19.31
1409	2	0	-39.44
1410	3	-25.47	81.2
1411	2	22.01	-13.4
1412	0	-32.52	34.3
1413	2	-33.11	76.8
1414	1	-5.25	10.16
1415	1	15	-30.44
1416	4	70.39	-13.37
1417	3	-75.75	-19.9
1418	3	-43.28	-12.26
1419	2	-14.99	-81.51
1420	0	5.07	-25.77
1421	1	-14.33	-5.15
1422	3	-81.67	-23.94
1423	1	37.87	24.54
1424	0	25.43	-15.78
1425	0	8.32	-68.47
1426	4	75.57	9.76
1427	3	-53.78	7.1
1428	3	-71.47	-7.76
1429	2	-37.48	-19.4
1430	2	-5.28	-81.24
1431	3	-61.43	-22.61
1432	1	16.51	-42.36
1433	2	-13.16	-85.71
1434	0	-18.67	24.12
1435	3	-71.06	-3.75
1436	1	-57.46	-23.78
1437	3	-70.42	-6.75
1438	0	9.5	57.02
1439	0	-38.16	22.88
1440	2	-42.6	-44.52
1441	1	-18.98	6.46
1442	1	-4.48	29.44
1443	2	10.19	-56.68
1444	1	-0.54	-1.8
1445	2	-34.79	-43.22
1446	0	11.01	-20.86
1447	3	-70.83	41.74
1448	1	14.46	49.65
1449	1	20.9	-43.94
1450	1	16.59	11.56
1451	1	-80.7	46.62
1452	2	2.53	-73.09
1453	1	-10.75	1.45
1454	0	-6.88	-60.14
1455	1	-31.4	14.59
1456	0	24.07	-19.32
1457	2	-13.08	-88.97
1458	2	-23.73	-45.5
1459	3	-43.46	62.28
1460	4	52.81	-7.83
1461	2	-47.45	-49.37
1462	3	-75.99	-20.26
1463	4	72.47	-29.21
1464	2	-30.1	47.23
1465	3	-84.85	-8.25
1466	3	-31.19	23.51
1467	3	-63.56	-24.24
1468	0	20.47	46.97
1469	4	74.71	-16.79
1470	1	9.74	8.54
1471	3	-22.3	83.49
1472	3	-59.16	-21.43
1473	0	16.72	37.9
1474	3	-43.33	-13.95
1475	3	-68.5	-35.53
1476	1	-11.69	-15.87
1477	4	63.65	17.14
1478	0	37.96	-44
1479	4	80	22.13
1480	4	44.05	-29.92
1481	0	-18.68	34.42
1482	0	23.88	-25.65
1483	1	-22	-21.92
1484	3	-67.34	0.94
1485	4	61.14	10.82
1486	0	28.27	-29.08
1487	4	71.34	-0.12
1488	4	79.78	22.56
1489	0	23.35	79.83
1490	4	101.99	1.77
1491	3	-74.06	-13.29
1492	1	-29.82	48.39
1493	4	86.53	16.39
1494	1	38.42	28.91
1495	4	51.31	-2.51
1496	1	-23.61	11.19
1497	0	-28.8	53.06
1498	4	78.41	-21.6
1499	3	-66.37	40.3
1500	4	86.66	16.54
1501	1	-17.65	-9.11
1502	1	-7	36.9
1503	3	-55.61	6.46
1504	1	-2.21	-68.64
1505	1	-34.61	1.79
1506	1	-14.46	-23.49
1507	1	18.76	-11.21
1508	1	11.15	49.55
1509	3	-72.78	-6.85
1510	1	-5.13	19.67
1511	3	-65.33	14.89
1512	3	-85.53	-28.31
1513	0	19.74	54.62
1514	4	58.44	-28.65
1515	3	-47.78	9.59
1516	2	-19.28	67.43
1517	0	28.73	4.17
1518	4	91	-7.31
1519	2	-15.36	46.23
1520	4	48.76	-18.44
1521	4	70.41	15.5
1522	0	5.74	18.07
1523	0	12.47	-45.12
1524	0	19.51	-40.68
1525	1	-8.06	-19.59
1526	2	-58.1	36.13
1527	4	94.1	1.79
1528	3	-80.68	-7.73
1529	2	-70.67	39.48
1530	4	78.92	21.52
1531	1	14.69	2.87
1532	2	-59.56	-17.85
1533	4	77.97	-4.44
1534	0	-13.8	-87.02
1535	1	-57.05	44.97
1536	4	76.88	-25.97
1537	0	8.3	-72.98
1538	3	-64.71	-30.41
1539	4	40.64	-14.3
1540	0	16.36	41.88
1541	4	66.66	-1.22
1542	4	64.99	-0.41
1543	0	2.72	33.82
1544	0	18.23	-2.13
1545	4	79.25	-1.03
1546	4	46.76	-6.56
1547	4	85.27	2.55
1548	2	-57.96	27.75
1549	0	-26.24	72.84
1550	1	-11.02	17.57
1551	0	18.11	-52.8
1552	2	-42.34	-48.62
1553	2	5.5	-64.94
1554	1	-29.07	7.08
1555	0	-10.55	55.93
1556	1	29.31	9.14
1557	1	-9.17	-0.89
1558	1	-21.92	-21.28
1559	2	-15.21	37.79
1560	3	-79.69	10.15
1561	4	78.1	-16.31
1562	0	5.06	39.21
1563	2	-11.52	56.56
1564	0	-6.17	-54.76
1565	4	67.23	4.77
1566	1	-11.96	-9.76
1567	2	-63.46	37.74
1568	4	62.22	-25.38
1569	4	68.49	7
1570	3	-54.11	2.26
1571	0	-6.74	-37.4
1572	2	-25.69	55.94
1573	0	5.71	22.06
1574	3	-70.87	13.26
1575	4	43.84	-4.64
1576	4	94.78	3.93
1577	3	-62.64	18.51
1578	0	37.71	13.28
1579	4	71.05	-22.72
1580	2	-13.86	-52.9
1581	1	20.04	-26
1582	3	-80.2	-23.58
1583	2	-1	-74.58
1584	3	-73.24	-4.27
1585	0	-16.49	46.49
1586	1	-15.74	-51.63
1587	3	-68.21	15.77
1588	0	2.19	-20.51
1589	4	73.03	-8.77
1590	4	77.18	-22.64
1591	1	31.92	18.95
1592	2	-35.49	-41.96
1593	3	-4.57	19.44
1594	1	0.58	0.72
1595	4	57.28	-32.43
1596	1	-3.56	7.46
1597	4	54	-12.23
1598	4	45.54	-25.68
1599	2	34.06	-45.73
1600	0	7.96	57.63
1601	1	-20.82	12.37
1602	0	14.43	-24.4
1603	3	-73.71	-31.84
1604	3	-56.89	12.75
1605	0	2.68	32.92
1606	0	-22.22	60.99
1607	1	-34.01	9.82
1608	3	-23.54	80.76
1609	3	-57.77	42.97
1610	1	42.67	14.92
1611	3	-68.9	-34.05
1612	0	26.15	66.03
1613	1	-12.59	-5.61
1614	1	12.27	-27.05
1615	4	56.46	-32.05
1616	0	14.3	-52.78
1617	1	29.81	6.5
1618	4	69.3	-4.75
1619	1	-7.72	21.49
1620	1	-35.43	2.59
1621	1	16.19	-13.33
1622	3	-74.7	-14.42
1623	0	-13.96	-88.59
1624	0	5.69	6.25
1625	3	-64.46	21.97
1626	1	-20.04	-20.2
1627	3	-57.56	28.56
1628	1	-17.2	23.85
1629	0	-17.79	53.89
1630	4	44.36	-6.52
1631	4	65.16	-0.79
1632	3	-53.52	2.87
1633	2	-49.61	35.82
1634	1	15.36	-5.72
1635	4	67.05	-18.02
1636	2	-7.75	-79.87
1637	2	6.52	-64.98
1638	1	-0.2	-37.81
1639	3	-85.33	-0.28
1640	0	3.29	17.96
1641	4	59.16	-23.59
1642	4	64.93	2.13
1643	3	-69.64	41.63
1644	0	13.6	-6.45
1645	1	-21.32	11.17
1646	0	8.93	-54.76
1647	3	-80.23	-19.95
1648	0	15.45	34.19
1649	4	81.25	-8.78
1650	3	2.6	-25.02
1651	2	-34.23	73.78
1652	0	12.25	53.88
1653	0	20.19	61.08
1654	0	-15.19	22.21
1655	1	-5.58	37.85
1656	1	-19.02	-1.49
1657	1	2.01	32.42
1658	0	16.16	33.53
1659	2	11.71	-51.93
1660	3	10.49	-15.32
1661	2	-45.95	-24.52
1662	0	-13.69	59.92
1663	2	-39.59	62.34
1664	1	14.53	14.11
1665	4	77.78	17.85
1666	4	43.72	-28.78
1667	1	-1.1	-6.6
1668	0	-21.5	67.59
1669	3	-49.13	30.15
1670	4	43.68	-11.28
1671	3	-87.17	-2.93
1672	4	48.82	-32.31
1673	1	-16.95	-20.83
1674	0	4.14	45.94
1675	0	13.17	-5.12
1676	3	-74.09	45.2
1677	4	99.19	6.38
1678	4	88.56	11.12
1679	1	-13.47	-20.61
1680	2	11.63	5.79
1681	3	-77.55	-11.07
1682	3	-69.42	-41.72
1683	2	-44.41	-30.86
1684	3	-75.58	-26.74
1685	2	27.28	-20.77
1686	3	-64.83	-15.81
1687	2	-19.27	47.54
1688	4	79.73	17.85
1689	4	75.26	-2.31
1690	0	-22.12	-33.57
1691	2	7.8	-25.43
1692	0	-11.46	-50.33
1693	3	-87.2	-2.02
1694	3	-57.36	29.49
1695	0	-60.62	-17.25
1696	4	74.14	8.83
1697	3	-64.04	15.01
1698	1	-8.87	6.75
1699	3	-30.16	59.42
1700	1	-76.96	46.23
1701	0	-14.39	45.39
1702	2	-44.9	-52.87
1703	4	67.4	-2.17
1704	0	27.81	-48.99
1705	2	-14.34	-74.11
1706	2	6.01	-35.3
1707	0	10.82	50.33
1708	1	13.57	0.97
1709	3	-76.44	7.43
1710	4	52.54	-31.52
1711	4	68.66	5.08
1712	4	76.73	-26.26
1713	4	78.89	-2.1
1714	2	19.17	-43.24
1715	1	18.27	9.56
1716	3	-26.03	42.44
1717	0	-17.3	47.04
1718	3	-87.21	-13.43
1719	3	-63.53	34.54
1720	2	1.76	-60.14
1721	3	-65.96	5.13
1722	2	-36.13	-24.82
1723	0	13.49	26.57
1724	3	-60.38	-14.73
1725	0	23.55	56.59
1726	4	53.98	-18.46
1727	1	-31.64	-34.69
1728	1	32.8	27.42
1729	1	-16.71	-18.53
1730	1	-16.07	14.35
1731	0	-22.93	62.08
1732	0	7.17	-50.59
1733	2	-25.62	80.81
1734	4	93.54	-4.96
1735	0	12.86	52.19
1736	0	11.64	52.47
1737	1	-35.13	5.3
1738	1	14.46	-24.37
1739	3	-65.54	-36.72
1740	0	27.47	72.27
1741	3	-78.42	-12.48
1742	0	12.52	40.61
1743	1	-12.11	10.58
1744	3	-80.41	-23.86
1745	1	-16.87	-23.14
1746	1	27.93	26.64
1747	3	-54.32	24.92
1748	2	-80.48	46.52
1749	3	-76.44	-31.82
1750	2	-38.72	-40.67
1751	1	-10.23	9.47
1752	2	-13.95	-73.04
1753	4	50.64	-12.01
1754	1	28.55	-0.22
1755	1	16.33	41.78
1756	0	-2.91	-8.39
1757	0	23.48	74.34
1758	4	80.36	-8.28
1759	4	59.51	-34.15
1760	0	23.77	66.25
1761	4	69.45	-18.05
1762	4	49.41	-2.56
1763	1	31.57	-35.98
1764	4	70.29	-30.72
1765	1	2.24	28.88
1766	0	-19.49	55
1767	0	17.17	-34.71
1768	0	5.58	46.13
1769	4	53.64	1.57
1770	2	-14.76	-83.5
1771	4	47.72	-9.75
1772	2	18.98	-55.73
1773	1	-13.3	-21.87
1774	3	-75.26	-13.04
1775	1	28.71	11.87
1776	0	-47.09	37.18
1777	2	-0.15	-71.66
1778	1	35.17	-46.42
1779	1	-5.8	14.03
1780	2	-17.69	68.38
1781	0	5.31	26.18
1782	4	87.35	16.49
1783	1	-8.9	6.4
1784	3	-68.53	17.21
1785	2	-6.8	-75.86
1786	3	-49.58	36.65
1787	2	5.47	37.29
1788	4	65.92	-7.9
1789	1	9.37	57.53
1790	1	-16.59	16.54
1791	3	-54.44	-20.26
1792	1	-2.9	6.81
1793	4	71.11	25.65
1794	0	8.55	-70.71
1795	2	-0.99	-64.9
1796	2	-6.19	-77.68
1797	3	-81.52	-14.48
1798	0	19.22	-52.76
1799	1	5.35	21.92
1800	1	21.36	6.29
1801	2	33.92	-46.25
1802	1	-36.83	16.62
1803	0	-15.48	-57.21
1804	4	49.48	-25.67
1805	0	1.49	-49.78
1806	0	24.88	78.04
1807	1	6.96	2.48
1808	0	-14.15	-46.15
1809	1	18.64	-18.49
1810	3	-73.1	-36.52
1811	0	16.66	38.9
1812	3	-43.55	5.27
1813	0	-10.55	0.39
1814	1	25.27	-2.48
1815	4	92.4	9.13
1816	2	6.74	-22.46
1817	2	-40.45	57.06
1818	3	-30.93	35.13
1819	3	-38.52	47.69
1820	4	92.61	2.34
1821	0	7.15	-63.86
1822	0	19.7	46.13
1823	4	62.9	-10.61
1824	3	-53.03	1.42
1825	3	-27.73	79.14
1826	1	5.67	45
1827	0	19.7	-39.89
1828	2	-44.22	-46.09
1829	4	64.87	14.11
1830	2	-13.89	-88.21
1831	3	-69.65	-26.63
1832	1	36.13	28.65
1833	1	-3.78	-43.48
1834	0	27.96	67.05
1835	1	18.83	-0.1
1836	4	54.1	-21.46
1837	4	87.5	19.31
1838	0	-1.88	31.6
1839	3	-78.17	12.66
1840	4	40.1	-12.66
1841	4	77.89	-6.26
1842	0	-18.65	34.86
1843	2	-78.08	45.77
1844	2	-44.9	-45.97
1845	2	-32.46	-35.49
1846	3	-80.89	2.23
1847	1	10.58	-20.96
1848	2	-25.51	-45.6
1849	4	67.5	1.84
1850	4	56.29	-12.28
1851	1	25.89	10.48
1852	1	14.04	-33.17
1853	3	-27.89	38.72
1854	2	-36.73	18.2
1855	1	-16.59	-20.65
1856	0	18.5	-42.84
1857	4	57.34	-27.21
1858	3	-70.09	-5.03
1859	3	-79.71	-17.98
1860	3	-69.81	-41.54
1861	3	-61.99	28.59
1862	0	16.01	34.77
1863	1	17.85	12.53
1864	4	50.7	-32.04
1865	0	-15.56	42.08
1866	1	16.7	-11.29
1867	3	-46.83	53.69
1868	3	-73.7	-5.39
1869	0	3.06	-21.51
1870	1	32.52	-37.46
1871	3	-81.53	-9.86
1872	0	25.53	-18.07
1873	1	33.4	15.68
1874	1	-11.77	0.75
1875	0	12.6	-34.49
1876	2	-32.36	-35.49
1877	1	33.78	27.03
1878	2	-66.05	40.77
1879	2	3.74	-51.09
1880	4	46.9	-2.6
1881	4	67.51	19.17
1882	4	61.23	-8.66
1883	0	-47.19	37.34
1884	4	46.57	-17.94
1885	3	-65.52	-15.61
1886	3	-79.7	-15.76
1887	3	-62.88	18.11
1888	3	-29.28	75.71
1889	1	5.21	16.56
1890	2	14.79	-43.75
1891	2	-7.92	53.93
1892	1	35.34	-45.88
1893	2	-8.86	-61.06
1894	1	10.83	54.75
1895	4	65.53	-27.74
1896	1	25.85	11.81
1897	4	92.97	16.99
1898	0	8.44	-70.34
1899	4	68.72	14
1900	4	50.05	-23.69
1901	4	72.79	-19.72
1902	4	43.62	-13.52
1903	4	100.46	1.72
1904	2	-39.05	-13.02
1905	0	-5.3	38.93
1906	4	88.53	14.42
1907	4	57.54	-12.15
1908	1	-26.69	30.39
1909	0	-2.2	41.64
1910	1	-41.4	-46.82
1911	3	-34.57	19.11
1912	0	6.41	44.44
1913	1	34.5	28.48
1914	2	-30.48	-43.93
1915	4	63.12	-4.94
1916	4	94.65	17.14
1917	4	83.7	19.77
1918	0	6.06	-15.9
1919	4	56.73	-31.79
1920	3	-22.3	61.02
1921	2	5.96	-54.5
1922	4	61.5	-7.8
1923	3	-45.24	39.32
1924	2	-9.43	-39.74
1925	4	60.27	13.17
1926	3	-35.99	2.66
1927	0	23.43	79.41
1928	4	101.87	2.39
1929	3	-64.53	13.77
1930	3	31.91	-19.09
1931	1	-0.52	-40.01
1932	2	-26.99	21.03
1933	3	-81.79	-17.71
1934	1	-18.83	6.54
1935	4	50.49	-11.82
1936	1	-12.18	-16.91
1937	3	-4.29	-39.56
1938	4	60.69	5.41
1939	1	31.87	26.1
1940	1	40.27	24.57
1941	4	77.63	9.53
1942	2	33.71	-19.95
1943	2	-68.64	35.48
1944	2	12.52	-49.74
1945	2	-36.86	68.45
1946	2	25.3	-39.57
1947	2	25.25	-38.7
1948	0	28.43	64.25
1949	4	78.02	-21.28
1950	1	34.88	28.51
1951	4	77.99	1.49
1952	3	-78.55	45.81
1953	1	-13.71	-22.97
1954	1	16.97	8.07
1955	0	20.17	56.59
1956	4	71.6	-21.73
1957	2	12.48	0.01
1958	3	-74.43	-17.2
1959	1	-27.06	9.54
1960	2	-79.72	-10.96
1961	2	-21.62	-42.66
1962	3	-63.63	27.99
1963	3	-30.5	61.36
1964	2	14.46	-43.3
1965	4	43.23	-5.01
1966	3	-73.69	42.1
1967	2	9.63	-36.83
1968	2	6.3	-67.67
1969	1	37.16	-44.27
1970	2	-39.33	-37.46
1971	2	-47.98	27.72
1972	0	26.35	59.19
1973	0	4.53	38.26
1974	3	-83.67	-11.74
1975	1	11.63	30.65
1976	0	18.17	-55.65
1977	1	37.56	18.02
1978	4	90.91	-7.17
1979	1	23.03	-34.47
1980	0	25.38	60.06
1981	0	8.44	-70.21
1982	1	-0.49	22.58
1983	0	20.9	81.77
1984	3	-18.07	64.33
1985	1	-26.22	20.62
1986	1	6.3	9.56
1987	2	0.63	-61.14
1988	4	64.92	-2.4
1989	1	-17.43	-9.04
1990	2	1.4	-60.54
1991	1	-13.25	-17.07
1992	4	81.8	9.19
1993	0	23.25	57.52
1994	4	96.29	10.48
1995	0	26.12	65.39
1996	4	92.52	3.09
1997	2	-26.86	-40.56
1998	3	-58.29	26.47
[truncated: 10,001 more rows]
